# Supplementary material for: A nationwide cohort study on diabetes severity and risk of Parkinson disease
Source: PubMed Central journal article supplement (PMC9883517; doi:10.1038/s41531-023-00462-8), 2023-01-27

Supplementary Table 1. The risk of Parkinson disease stratified according to the diabetes severity parameters in Men

|                                       |           | Events (n) | Incidence rate (per<br>1000 person-years) | Model 1           | Model 2           |
|---------------------------------------|-----------|------------|-------------------------------------------|-------------------|-------------------|
| Duration of diabetes                  | < 5 years | 4378       | 0.665                                     | 1 (ref.)          | 1 (ref.)          |
|                                       | ≥ 5 years | 3721       | 1.322                                     | 1.35 (1.29, 1.41) | 1.21 (1.15, 1.28) |
| Number of Oral<br>hypoglycemic agents | < 3       | 6553       | 0.802                                     | 1 (ref.)          | 1 (ref.)          |
|                                       | ≥ 3       | 1546       | 1.252                                     | 1.31 (1.24, 1.38) | 1.15 (1.08, 1.22) |
| Use of insulin                        | No        | 7067       | 0.808                                     | 1 (ref.)          | 1 (ref.)          |
|                                       | Yes       | 1032       | 1.567                                     | 1.55 (1.45, 1.65) | 1.30 (1.21, 1.39) |
| Chronic kidney disease                | No        | 6728       | 0.786                                     | 1 (ref.)          | 1 (ref.)          |
|                                       | Yes       | 1371       | 1.625                                     | 1.13 (1.06, 1.20) | 1.09 (1.02, 1.17) |
| Diabetic retinopathy                  | No        | 6944       | 0.793                                     | 1 (ref.)          | 1 (ref.)          |
|                                       | Yes       | 1155       | 1.784                                     | 1.54 (1.45, 1.64) | 1.33 (1.25, 1.43) |
| Cardiovascular disease                | No        | 6504       | 0.752                                     | 1 (ref.)          | 1 (ref.)          |
|                                       | Yes       | 1595       | 2.106                                     | 1.59 (1.50, 1.68) | 1.38 (1.29, 1.47) |

Model 1: adjusted for age and sex

Model 2: adjusted for age, sex, BMI, alcohol drinking, smoking, regular exercise, hypertension, dyslipidemia and depression

Supplementary Table 2. The risk of Parkinson disease stratified according to the diabetes severity parameters in Women

|                                       |           | Events (n) | Incidence rate (per<br>1000 person-years) | Model 1           | Model 2           |
|---------------------------------------|-----------|------------|-------------------------------------------|-------------------|-------------------|
| Duration of diabetes                  | < 5 years | 4497       | 1.040                                     | 1 (ref.)          | 1 (ref.)          |
|                                       | ≥ 5 years | 4450       | 1.795                                     | 1.38 (1.32, 1.44) | 1.25 (1.19, 1.31) |
| Number of Oral<br>hypoglycemic agents | < 3       | 7101       | 1.243                                     | 1 (ref.)          | 1 (ref.)          |
|                                       | ≥ 3       | 1846       | 1.697                                     | 1.30 (1.23, 1.37) | 1.15 (1.09, 1.22) |
| Use of insulin                        | No        | 7577       | 1.229                                     | 1 (ref.)          | 1 (ref.)          |
|                                       | Yes       | 1370       | 2.150                                     | 1.65 (1.55, 1.74) | 1.40 (1.32, 1.48) |
| Chronic kidney disease                | No        | 6530       | 1.132                                     | 1 (ref.)          | 1 (ref.)          |
|                                       | Yes       | 2417       | 2.335                                     | 1.30 (1.24, 1.37) | 1.29 (1.22, 1.36) |
| Diabetic retinopathy                  | No        | 7362       | 1.213                                     | 1 (ref.)          | 1 (ref.)          |
|                                       | Yes       | 1585       | 2.159                                     | 1.55 (1.47, 1.63) | 1.36 (1.29, 1.44) |
| Cardiovascular disease                | No        | 7111       | 1.161                                     | 1 (ref.)          | 1 (ref.)          |
|                                       | Yes       | 1836       | 2.710                                     | 1.61 (1.53, 1.69) | 1.41 (1.33, 1.49) |

Model 1: adjusted for age and sex

Model 2: adjusted for age, sex, BMI, alcohol drinking, smoking, regular exercise, hypertension, dyslipidemia and depression

Supplementary Table 3. The risk of Parkinson disease by category of fasting blood glucose (FBG) among patients with type 2 diabetes mellitus

| FBG         | Events (n) | Incidence rate (per<br>1000 person-years) | Model 1           | Model 2           |
|-------------|------------|-------------------------------------------|-------------------|-------------------|
| < 100 mg/dl | 2566       | 1.59                                      | 1.22 (1.15, 1.29) | 1.09 (1.02, 1.16) |
| 100 – 110   | 1581       | 1.44                                      | 1.16 (1.09, 1.24) | 1.03 (0.96, 1.10) |
| 110 – 120   | 1804       | 1.40                                      | 1.18 (1.11, 1.25) | 1.05 (0.97, 1.12) |
| 120 – 129   | 2445       | 0.96                                      | 1 (ref.)          | 1 (ref.)          |
| 130 – 139   | 2604       | 0.87                                      | 0.99 (0.93, 1.04) | 1.04 (0.96, 1.12) |
| 140 – 149   | 1635       | 0.92                                      | 1.03 (0.96, 1.09) | 1.10 (1.01, 1.19) |
| 150 – 159   | 1069       | 0.92                                      | 1.04 (0.97, 1.12) | 1.10 (1.01, 1.20) |
| 160 – 169   | 722        | 0.91                                      | 1.04 (0.96, 1.13) | 1.10 (0.99, 1.21) |
| 170 – 179   | 563        | 0.98                                      | 1.14 (1.04, 1.25) | 1.21 (1.08, 1.34) |
| 180 – 189   | 414        | 0.94                                      | 1.14 (1.02, 1.26) | 1.20 (1.07, 1.36) |
| 190 – 199   | 314        | 0.92                                      | 1.15 (1.02, 1.29) | 1.17 (1.02, 1.34) |
| ≥ 200 mg/dl | 1329       | 0.85                                      | 1.18 (1.10, 1.26) | 1.23 (1.14, 1.34) |

Model 1: adjusted for age and sex

Model 2: adjusted for age, sex, BMI, alcohol drinking, smoking, regular exercise, hypertension, dyslipidemia and depression

Supplementary Table 4. The risk of Parkinson disease according to the diabetes severity score (0-7) including fasting blood glucose category

|                                |                | Events (n) | Incidence rate (per 1000 person-years) | Model 1           | Model 2            |
|--------------------------------|----------------|------------|----------------------------------------|-------------------|--------------------|
| Fasting blood glucose          | 100-139 mg/dl  | 8434       | 1.062                                  | 1 (ref.)          | 1 (ref.)           |
|                                | <100mg/dl      |            |                                        |                   |                    |
|                                | or ≥ 140 mg/dl | 8612       | 1.043                                  | 1.06 (1.03, 1.09) | 1.10(1.06, 1.14)   |
| <b>Diabetes Severity Score</b> |                |            |                                        |                   |                    |
|                                | 0              | 3068       | 0.686                                  | 1 (ref.)          | 1 (ref.)           |
|                                | 1              | 4774       | 0.811                                  | 1.07 (1.02, 1.12) | 1.06 (0.99, 1.14)  |
|                                | 2              | 3746       | 1.231                                  | 1.24 (1.19, 1.31) | 1.16 (1.08, 1.234) |
|                                | 3              | 2813       | 1.638                                  | 1.55 (1.48, 1.64) | 1.40 (1.31, 1.49)  |
|                                | 4              | 1646       | 2.158                                  | 1.90 (1.78, 2.01) | 1.64 (1.52, 1.76)  |
|                                | 5              | 779        | 2.994                                  | 2.47 (2.28, 2.68) | 2.05 (1.87, 2.24)  |
|                                | 6              | 188        | 3.233                                  | 2.53 (2.18, 2.93) | 2.00 (1.72, 2.34)  |
|                                | 7              | 32         | 5.551                                  | 4.13 (2.92, 5.85) | 3.19 (2.25, 4.54)  |

Model 1: adjusted for age and sex

Model 2: adjusted for age, sex, BMI, alcohol drinking, smoking, regular exercise, hypertension, dyslipidemia and depression

Supplementary Figure 1. Flow chart of the study population

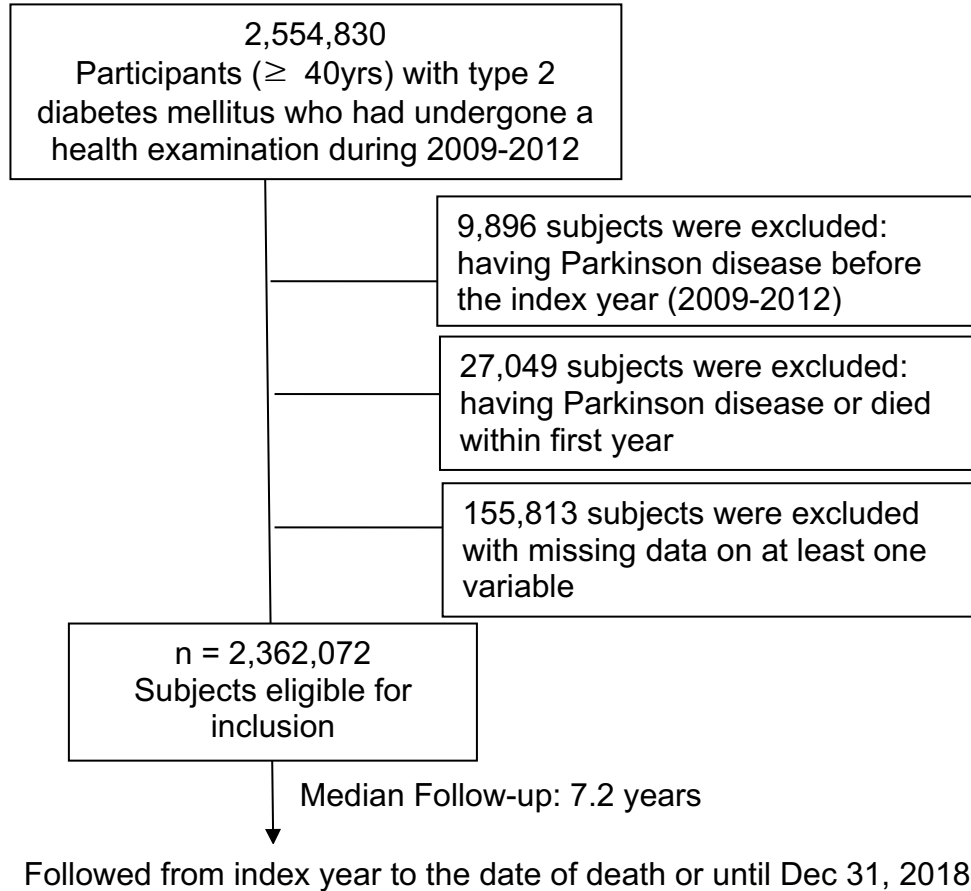

Supplement: 41531_2023_462_MOESM1_ESM.pdf [file 41531_2023_462_MOESM1_ESM.pdf]
